1 **Heritable variation in bleaching responses and its functional genomic basis in reef-building**  
2 **corals (*Orbicella faveolata*)**

3

4 Katherine E. Dziedzic<sup>1</sup>, Holland Elder<sup>1</sup>, & Eli Meyer<sup>1\*</sup>

5

6 <sup>1</sup>Department of Integrative Biology, Oregon State University, Corvallis OR

7

8 Keywords: *heritability, genomic, thermal tolerance, coral bleaching*

9

10 \* Author for Correspondence:

11 email: eli.meyer@oregonstate.edu

12 Article Type: Primary Research Article

13

14 **Abstract**

15 Reef-building corals are highly sensitive to rising ocean temperatures, and substantial  
16 adaptation will be required for animals and the ecosystems they support to persist in changing  
17 ocean conditions. Genetic variation that might support adaptive responses has been measured in  
18 larval stages of some corals, but these estimates remain unavailable for adult corals and the  
19 functional basis of this variation remains unclear. In this study, we focused on the potential for  
20 adaptation in *Orbicella faveolata*, a dominant reef-builder in the Caribbean. We conducted  
21 thermal stress experiments using corals collected from natural populations in Bocas del Toro,  
22 Panama, and then used multilocus SNP genotypes to estimate genetic relatedness among  
23 samples. This allowed us to estimate narrow-sense heritability of variation in bleaching  
24 responses, revealing that this variation was highly heritable ( $h^2=0.89$ ). This estimate suggests  
25 substantial potential for adaptive responses to warming by natural populations of *O. faveolata* in  
26 this region. To investigate the functional basis for this variation, we applied genomic and  
27 transcriptomic approaches enabled by growing sequence resources for this species. We used a  
28 genetic linkage map we've recently developed to map associations between SNP genotypes and  
29 bleaching responses, and identified two genetic markers associated with bleaching. We also  
30 profiled gene expression in corals with contrasting bleaching phenotypes, uncovering substantial  
31 variation in responses to thermal stress between heat-tolerant and heat-susceptible corals.

32 Integrating these genomic and transcriptomic data with quantitative genetic analysis provides a  
33 new perspective on the mechanistic basis for thermal tolerance phenotypes and the potential for  
34 adaptation to rising ocean temperatures.

35

## 36 **Introduction**

37 Coral reefs are one of the most diverse and complex ecosystems in the world. They  
38 provide habitat for hundreds of thousands of invertebrates and fish, protect coastal environments,  
39 and support a variety of resources for local communities. Unfortunately, the invaluable  
40 ecosystems services they provide are at risk of being lost as coral reefs worldwide continue to  
41 decline. Coral reefs are particularly sensitive to increases in sea surface temperature and have  
42 undergone worldwide degradation as ocean temperatures have warmed (Brown, 1997; Hoegh-  
43 Guldberg & Jones, 1999; Baker *et al.*, 2004; Eakin *et al.*, 2009). Bleaching events, which reflect  
44 the breakdown of symbiotic relationships between corals and dinoflagellates (*Symbiodinium*  
45 *spp.*) resulting from environmental stress, have increased in frequency and severity over the past  
46 few decades (Hughes, 2003; Donner *et al.*, 2005; Hoegh-Guldberg *et al.*, 2007). In the past three  
47 years alone, 30-50% of coral reefs have declined in some areas along the Great Barrier Reef  
48 (Hughes *et al.*, 2017). This dramatic decline in such a short period of time demands an increased  
49 understanding of the potential for these ecosystems to persist into the future.

50 In order to persist, corals will need to increase their thermal tolerance to cope with ocean  
51 warming. It is already known that coral species have differing thermal capacities due to extrinsic  
52 factors such as variation in their environment, as well as intrinsic mechanisms to deal with acute  
53 and long-term stress events, such as varying associations in symbiont type (Baker *et al.*, 2004;  
54 Van Oppen *et al.*, 2005; Jones *et al.*, 2008) or changes in gene expression in the coral host  
55 (Bellantuono *et al.*, 2012a; Kenkel *et al.*, 2013). Importantly, bleaching thresholds for some  
56 species have been shown to change over time (Fitt *et al.*, 2001; Grottoli *et al.*, 2014). Models that  
57 consider both environmental conditions and these changing thresholds suggest that the fate of  
58 corals during the next century may be strongly affected by long-term adaptive changes in  
59 bleaching thresholds (Donner *et al.*, 2005; D'Angelo *et al.*, 2015). Changes in bleaching  
60 thresholds may occur in populations through adaptation (Meyer *et al.*, 2009; Coles & Riegl,  
61 2013; Palumbi *et al.*, 2014), or in individual corals through acclimatization (Jones &  
62 Berkelmans, 2010; Oliver & Palumbi, 2011).

63           Adaptation through genetic change can play a large role in allowing populations to persist  
64 in a changing environment. Genetic variation within a population allows individuals to adapt to  
65 environmental conditions (Falconer & Mackay, 1996; Barrett & Schluter, 2008). Predicting the  
66 adaptive potential of a trait requires an understanding of the proportion of phenotypic variation  
67 resulting from genetic factors (Falconer and Mackay, 1996). However, the relative contributions  
68 of environmental and genetic factors to variation in thermal tolerance of corals remain poorly  
69 understood (Császár *et al.*, 2010). Some studies have provided evidence for corals' adaptive  
70 capacity, demonstrating thermal tolerance differences between local populations (Palumbi *et al.*,  
71 2014; Howells *et al.*, 2016) and considerable heritable variation in thermal tolerance in coral  
72 larvae (Dixon *et al.*, 2015) and algal symbionts (Császár *et al.*, 2010). These examples have  
73 provided an important first demonstration that genetic potential for adaptation exists in natural  
74 populations, but many questions still remain.

75           Sea surface temperatures are predicted to rise 1-2°C by the end of the century, and  
76 thermally sensitive organisms like reef-building corals will require substantial adaptive  
77 responses. Adaptive responses to selection depend on the change in a population's phenotypic  
78 mean and the narrow-sense heritability ( $h^2$ ), the proportion of total phenotypic variance that is  
79 due to additive genetic factors (Falconer and Mackay, 1996). Quantitative estimates of this  
80 parameter allow us to estimate the expected evolutionary change in a trait per generation  
81 (Visscher *et al.*, 2008; Morrissey *et al.*, 2012). In order to estimate selection responses in corals  
82 and consider rates of adaptation, we need to quantify heritability in thermal tolerance. Currently,  
83 very few studies provide heritability estimates for coral species and their algal symbionts,  
84 particularly in natural populations (Meyer *et al.*, 2009b; Dixon *et al.*, 2015; Kenkel *et al.*, 2015).  
85 Previous studies have focused on larval stages for important advantages in experimental design,  
86 leaving it unclear whether the high heritabilities estimated in larval responses to elevated  
87 temperatures (Meyer *et al.*, 2009, Dixon *et al.*, 2015) can be generalized to understand responses  
88 to selection on the adult stage. Since the heritability of a trait is specific to a particular population  
89 and environment, it remains unclear whether the estimates of  $h^2$  from Indo-Pacific Acroporids  
90 can be generalized to evaluate adaptive potential in other regions and species.

91           The Caribbean has seen considerable loss in coral cover over the last thirty years (Hughes  
92 & Tanner, 2000; Gardner, 2003) and questions still remain whether existing populations can  
93 adapt to the changing climate. To understand the potential for adaptation by corals in this region,

94 we investigated the mechanisms that may enable long-term adaptation by investigating heritable  
95 variation in thermal tolerance and its genomic basis in *Orbicella faveolata*, a dominant reef-  
96 builder in the Caribbean. We focus on the contribution of genetic factors to variation in corals'  
97 thermal tolerance, providing new insights into the potential for corals' thermal tolerance to  
98 respond to selection during ongoing climate change. Thermal stress experiments were conducted  
99 at the Smithsonian Tropical Research Institute in Bocas del Toro, Panama, using coral fragments  
100 collected from natural populations.

101

## 102 **Materials and Methods**

### 103 *Sampling and thermal stress experiment*

104 To study natural variation in thermal tolerance of corals, we measured responses to  
105 thermal stress in corals sampled from a natural population. For these experiments we sampled 43  
106 colonies of *Orbicella faveolata* genotypes. We collected coral colonies from seven reef sites  
107 around the Bocas del Toro, Panama archipelago in 2015 (Figure 1a). Large intact colonies were  
108 extracted off the reef and tissue samples were collected and stored in RNAlater for genotyping  
109 (Scientific Permit No. SC/A-28-14). Colonies were maintained at ambient temperature in aquaria  
110 at the Smithsonian Tropical Research Institute (STRI) on Isla Colon, Bocas del Toro. Prior to  
111 thermal experiments, each colony was cut into nine smaller uniform fragments with  
112 approximately 15-20 polyps per fragment. Initial photographs of each individual fragment were  
113 taken before experiments began.

114 To estimate thermal tolerance we exposed replicate fragments from each colony to a  
115 thermal stress treatment and measured their bleaching responses. Three randomly chosen  
116 fragments from each genotype were maintained at control conditions (ambient seawater  
117 temperature of 29°C) while the remaining six fragments were ramped approximately 0.1°C every  
118 two hours to an elevated temperature treatment of 31°C for two weeks and 32°C for an  
119 additional two weeks. Corals were maintained for 4 weeks in normal and elevated temperatures,  
120 with daily pH and salinity measurements taken. Corals were monitored by daily visual inspection  
121 to evaluate bleaching response using the Coral Watch color scorecard, and the effects of  
122 temperature stress were scored as the number of degree heating weeks (DHW) required to induce  
123 bleaching. The experiment was terminated when approximately half of the fragments were

124 bleached. Photographs were taken at the end of 4 weeks and tissues were sampled and stored in  
125 RNAlater.

126

### 127 *Multilocus SNP genotyping of coral colonies*

128 To estimate genetic relatedness and test for genetic associations with thermal tolerance,  
129 we conducted multilocus SNP genotyping on all coral colonies. To that end, we extracted  
130 genomic DNA from each colony using the Omega bio-tek E.Z.N.A. Tissue DNA Kit (Omega  
131 Bio-tek, Norcross, GA). We used the 2bRAD (Restriction Site-Associated DNA) protocol for  
132 SNP genotyping, a streamlined and cost-effective method for genome-wide SNP genotyping  
133 (Wang *et al.*, 2012). For these libraries we used the reduced tag representation method  
134 previously described (Wang *et al.*, 2012), using selective adaptor with overhangs ending in “NR”  
135 to target ¼ of the AlfI sites in the genome. We combined these libraries in equimolar amounts  
136 for sequencing in a single lane of 50 bp SE reads on Illumina HiSeq 3000 at OSU’s Center for  
137 Genome Research and Biocomputing (CGRB).

138 We analyzed the resulting data using a 2bRAD reference our research group has recently  
139 produced and used for a linkage map (Snelling *et al.*, 2017). Since the reference was produced  
140 from larval stages that naturally lack algal symbionts, no special filtering is required to eliminate  
141 any algal reads in these samples from adult tissue. We conducted this analysis as previously  
142 described for de novo analysis of corals (Wang *et al.*, 2012; Howells *et al.*, 2016). Briefly, we  
143 filtered reads prior to analysis to exclude any low quality or uninformative reads, then aligned  
144 reads to the reference and called genotypes based on nucleotide frequencies at each position  
145 (calling loci homozygous if a second allele was present at less than 1%, heterozygous if present  
146 at > 25%, and leaving the genotype undetermined at intermediate frequencies where genotypes  
147 cannot be confidently determined from allele frequencies). Genotypes were called with a  
148 permissive threshold of  $\geq 5x$  to call as many loci as possible for this genome wide survey of  
149 associations with bleaching responses. The scripts used for this analysis are available at  
150 ([https://github.com/Eli-Meyer/2brad\\_utilities](https://github.com/Eli-Meyer/2brad_utilities)).

151

### 152 *Profiling algal symbionts with amplicon sequencing (ITS2)*

153 To control for variation in the algal symbiont communities of each coral, which can  
154 contribute to variation in thermal tolerance of the holobiont (host plus associated algal and

155 microbial symbionts) (Abrego *et al.*, 2008; Howells *et al.*, 2011), we sequenced the dominant  
156 symbiont type in each colony. We amplified ITS2 using PCR primers previously described for  
157 studies of *Symbiodinium* diversity (LaJeunesse, 2002), and sequenced the resulting amplicons  
158 using Sanger Sequencing. The resulting sequences were compared with multiple known ITS2  
159 sequences from all clades A-H (Hunter *et al.*, 2007). Using our symbiont sequences and these  
160 reference ITS2 sequences, we created an alignment in the program MEGA (Kumar *et al.*, 2017).  
161 A maximum likelihood phylogenetic tree was created with all known and unknown sequences to  
162 determine which clades our coral samples fell into. The dominant symbiont type was assigned  
163 for each sample by comparing the phylogenetic tree of unknown and known samples. While  
164 these data lack resolution to describe quantitative mixtures of algal symbiont types, we interpret  
165 these sequences as the dominant symbiont types in each sample based on the presence of a single  
166 dominant haplotype in sequencing chromatograms. We included this information in quantitative  
167 models of bleaching responses to evaluate the contribution of variation in the dominant symbiont  
168 type to variation in thermal tolerance.

169

#### 170 *Quantifying bleaching responses*

171 To quantify bleaching in each fragment, we used qPCR to estimate the abundance of  
172 algal symbionts relative to host cells (Cunning *et al.*, 2015). We quantified collected samples  
173 after stress experiments in qPCR reactions. DNA from all six fragments post heat stress was  
174 extracted using an organic phase extraction. All qPCR reactions were run on an Eppendorf  
175 Realplex 4 machine using the SYBR and ROX filters. Each reaction consisted of 7.5  $\mu$ L  
176 SensiFAST SYBR Hi-ROX master mix (Bioline, Taunton, MA), 4.3  $\mu$ l NFW, 0.6  $\mu$ l each of  
177 forward and reverse 10- $\mu$ M primers, and 2  $\mu$ l of genomic DNA in a final volume of 15  $\mu$ l. The  
178 thermal profile for each reaction consisted of an initial denaturing step of 95°C for 2 min,  
179 followed by 40 cycles of: 95°C for 5 s, annealing temperature of 60°C for 30 s, and then 72°C  
180 for 30 sec. All samples were run using the same reaction parameters and were analyzed together.  
181 In addition, one sample was included on every plate as an inter-plate calibrator. We quantified  
182 host cells using host actin loci using the forward (5'-CGCTGACAGAATGCAGAAAGAA-3')  
183 and reverse (5'-CACATCTGTTGGAAGGTGGACA-3') primers, as previously described  
184 (Cunning *et al.*, 2015). To quantify *Symbiodinium* in each sample we used a pair of universal  
185 primers developed based on multiple sequence alignments of the cp23S-rDNA locus from



186 multiple Symbiodinium clades (<https://www.auburn.edu/~santosr/sequencedatasets.htm>). We  
187 identified regions that were sufficiently conserved to design primers suitable for qPCR (53-76  
188 and 169-189 in that alignment). We conducted qPCR with primers (5'-  
189 CTACCTGCATGAAACATAGAACG -3' and 5'- CCCTATAAAGCTTCATAGGG -3') to  
190 determine the total amount of symbiont cells present after experimentation. Host cell  
191 quantifications ( $C_T$  values) were subtracted from symbiont cell quantifications to calculate the  
192  $dC_T$  value in each fragment, a measure of the ratio of symbiont cells to host cells. These  $dC_T$   
193 values were then compared to a reference control sample to generate  $ddC_T$  values, representing  
194 the symbiont density in all samples relative to a reference sample. We analyzed these qPCR data  
195 on relative symbiont density of each fragment to evaluate the effects of genotype, origin, and  
196 symbiont type on bleaching responses.

197

#### 198 *Estimating heritability of variation in bleaching responses*

199 Estimating the heritability of this variation in bleaching responses requires information  
200 on genetic relationships among subjects, which is initially unknown in samples collected from a  
201 natural population. For our study, we inferred genetic relatedness among samples based on  
202 multilocus SNP genotypes, and then used the genetic relatedness matrix derived from these SNPs  
203 to estimate genetic variance components. For this analysis we used the 'related' package in R  
204 (Queller & Goodnight, 1989; Muir & Frasier, 2015). After developing this matrix of genetic  
205 relatedness among samples, we analyzed variation in bleaching responses in the context of these  
206 relationships to estimate heritability. We used a linear mixed model with genotype and symbiont  
207 type as random effects and population source as a fixed effect.

208

#### 209 *Testing for genetic associations with bleaching responses*

210 To identify genetic markers associated with variation in bleaching responses, we tested  
211 for associations at each SNP locus using linear mixed models including genotype as a random  
212 effect and population source as a fixed effect. To account for errors arising from multiple tests, we  
213 converted controlled false discovery rate at 0.05 using the pFDR procedure (Storey, 2003). The  
214 multilocus SNP genotypes obtained from 2bRAD made it possible to test for associations  
215 between bleaching phenotypes and genotypes at each locus. Combining SNP data and the  
216 linkage map for this species (Snelling *et al.*, 2017), we searched for genomic regions underlying

217 variation within more thermally tolerant phenotypes to identify loci associated with bleaching.  
218 Once significant SNPs were found, we searched genomic scaffolds to examine neighboring  
219 genes. Based on an integrated genomic resource our group has recently developed by combining  
220 the linkage map with transcriptome and genome assemblies (Snelling *et al.*, 2017), we searched  
221 10 cM upstream and downstream of each significant SNP to identify genes linked to each SNP.

222

### 223 *Profiling gene expression in heat-tolerant and susceptible colonies*

224 To evaluate whether genomic regions associated with heat tolerance include genes  
225 differentially expressed between heat-tolerant and susceptible genotypes, we profiled  
226 transcriptional responses in a subset of corals chosen for contrasting phenotypes (3 heat-tolerant  
227 and 3 heat-susceptible) (Figure 2). RNA was extracted from replicate fragments from each  
228 colony using the Omega Bio-tek E.Z.N.A. Tissue RNA Kit (Omega Bio-tek, Norcross, GA).  
229 RNA was then used to prepare 3' tag-based cDNA libraries for expression profiling (Meyer *et al.*,  
230 2011). Samples were individually barcoded and combined in equal ratios for multiplex  
231 sequencing on two runs, one run on the HiSeq 3000 platform at OSU's CGRB and the second run  
232 on HiSeq 4000 at the University of Oregon's Genomic and Cell Characterization Core Facility.  
233 We first processed the raw sequences to remove non-template regions introduced during library  
234 preparation, and excluded reads with long homopolymer regions (>20bp) and low-quality reads  
235 with a Phred score of <30. All filtering steps were conducted using publicly available Perl scripts  
236 from ([https://github.com/Eli-Meyer/rnaseq\\_utilities](https://github.com/Eli-Meyer/rnaseq_utilities)). We mapped the remaining high quality  
237 reads against the transcriptome for this species (Anderson *et al.*, 2016) using a short-read aligner  
238 software SHRiMP (Rumble *et al.*, 2009), and counted unique reads aligning to each gene to  
239 produce counts data for statistical analysis of gene expression in each sample.

240 We tested for differential gene expression using a negative binomial model in the R  
241 package DESeq2 (Love *et al.*, 2014). We tested for changes in gene expression by evaluating  
242 changes in both constitutive and stress-induced expression across samples. We first tested for the  
243 interaction effect between treatment (control versus heat stress treatment) and bleaching response  
244 (susceptible versus tolerant). Next, we tested for each main effect, treatment and bleaching  
245 response. We extracted differentially expressed genes (DEGs) to compare expression across  
246 samples, then searched for patterns of expression across all DEGs for each of the three models  
247 tested, and categorized DEGs based on similarity in expression patterns.



248

## 249 **Results**

### 250 *SNP genotyping and genetic analysis of corals*

251 To analyze genetic relationships among corals and associations with bleaching responses,  
252 we conducted multilocus SNP genotyping using a sequencing-based approach (2bRAD).  
253 Altogether, we sequenced 150 million high-quality reads, averaging 3.87 million reads per  
254 colony. We mapped these reads to a reference previously developed from aposymbiotic larvae,  
255 ensuring the loci being genotyped are derived from the coral host rather than the algal symbionts.  
256 We genotyped >700 kb at  $\geq 5x$  coverage (Supplementary Table S1), including a large number of  
257 putative polymorphisms. We further filtered genotypes to minimize missing data and genotyping  
258 errors, identifying a set of 5,512 high-quality SNPs that we used for all subsequent analyses.

259

### 260 *Symbiodinium communities in host colonies and bleaching responses*

261 Sanger sequencing produced clear ITS2 amplicon reads for each colony, suggesting that  
262 a single type was dominant in these colonies. To identify the dominant symbiont type in each  
263 sample we constructed a maximum likelihood tree using our sequences and multiple  
264 representatives from Symbiodinium clades A-H (Hunter *et al.*, 2007). According to our  
265 maximum likelihood phylogenetic tree, clades A-D were present across all colonies as a  
266 dominant type (Figure 1b), but symbiont type varied across sites. It is likely that there are mixed  
267 communities in these samples, but we judged that information on the dominant type was  
268 sufficient to control for confounding effects of symbiont type.

269 After 4 weeks in thermal stress at 31°C and 32°C, we saw considerable variation in  
270 bleaching among stressed fragments, while symbiont density changed very little across control  
271 samples. While there was variation between colonies, there was little to no variation in bleaching  
272 among fragments from the same colony (Figure 2). We quantified symbiont densities in each  
273 fragment using qPCR, and compared stress and control phenotypes to determine the average  
274 reduction in symbiont abundance in each colony. We estimated the bleaching response of each  
275 colony as the difference between average  $ddC_T$  for stressed and control fragments. Colonies  
276 showed substantial variation in both their initial symbiont densities and their bleaching  
277 responses, based on both visual examination of the fragments and qPCR analysis of relative  
278 symbiont abundance (Figure 2 and 3). Most colonies bleached in response to thermal stress, but

279 the extent of these bleaching responses varied considerably (Figure 3).

280

### 281 *Heritable variation in thermal tolerance in a natural population*

282 To investigate heritable variation in thermal tolerance, we combined SNP data with  
283 bleaching responses measured by qPCR. We conducted a mixed model analysis to determine  
284 which factors to include in our heritability and association models. While genotype and  
285 population source had significant effects on thermal tolerance ( $p=0.0002$  and  $p=0.025$ ,  
286 respectively), symbiont type had no effect ( $p=0.84$ ). To be conservative, we included all factors  
287 in our REML mixed model to partition variation in thermal tolerance into genetic and non-  
288 genetic variance components. We estimated genetic relatedness among samples based on  
289 multilocus SNP genotypes, and then partitioned variance into genetic and non-genetic variance  
290 components in an animal model based on this genetic relatedness matrix. This analysis revealed  
291 that variation in bleaching responses was highly heritable, with a narrow-sense heritability ( $h^2$ ) of  
292 0.89. Taken alone, this estimate suggests substantial potential for adaptive responses to ocean  
293 warming in this population (but see Discussion for additional considerations).

294

### 295 *Genomic basis for variation in thermal tolerance*

296 To understand the genomic basis for variation in thermal tolerance, we used our SNP  
297 genotypes to test for association between bleaching responses and coral genotypes. For this  
298 analysis, we conducted a series of linear mixed models with genotype as a random factor and  
299 population source as a fixed factor. We conducted tests at each locus to determine if the  
300 bleaching responses depended on the genotype at that locus. To visualize regions of the genome  
301 showing strong association with thermal tolerance, we mapped the results from statistical tests  
302 onto the integrated map, plotting  $-\log_{10}(p\text{-value})$  for each marker by linkage group and position  
303 (Figure 4). After multiple test corrections, we found two loci significantly associated with  
304 bleaching with q-values  $\leq 0.05$  (Storey, 2003).

305 To further characterize where these SNPs were located and their biological functions, we  
306 used the integrated map (Snelling *et al.*, 2017) to search 10cM up and downstream of each SNP.  
307 Our SNPs fell onto linkage groups 11 and 5, with the SNP on linkage group 5 falling directly  
308 onto a gene, Scm-like protein involved in histone-binding. Within the 20 cM windows around  
309 our SNPs, we searched across scaffolds and located annotated and unannotated genes within

310 gene neighborhoods. All genes identified in this analysis are shown in Supplementary Table S2.  
311 On linkage group 5, genes of interest included a universal stress protein, poly (ADP-ribose)  
312 polymerase, a protein involved in oxidative stress response, a potassium voltage-gated channel  
313 protein, and proteins involved in translation. Genes linked to the marker on LG 11 included a  
314 hypopyruvate reductase, cytoskeletal proteins, and proteins involved in organelle organization  
315 and biosynthesis.

316

### 317 *Differences in transcriptional responses of tolerant and susceptible phenotypes*

318 To further investigate the mechanisms of thermal tolerance, we profiled gene expression  
319 in contrasting phenotypes. For this dataset, we chose three heat-tolerant colonies and three  
320 susceptible colonies (Figure 2). Using a tag-based RNASeq approach (Meyer *et al.*, 2011), we  
321 prepared sequencing libraries for all 36 fragments (six colonies with six fragments, three control  
322 and three heat-stress fragments). We sequenced our libraries twice, once on Illumina HiSeq 3000  
323 and once on HiSeq 4000, and all sequenced reads from both runs were combined. In total, 56.7  
324 million raw reads were produced, with approximately 1.58 million reads per sample. The  
325 majority of these passed quality and adaptor filtering (95.6%) leaving 54.2 million HQ reads for  
326 expression analysis.

327 Using a negative binomial model, we tested for changes in gene expression, evaluating  
328 differences in both constitutive and stress-induced expression. Our model tested for the effect of  
329 bleaching response, whether the colonies were bleached or unbleached, the effect of treatment,  
330 whether the fragments were in control or heat-stress, and the interaction effect between type and  
331 treatment. We found 1,097, 62, and 210 differentially expressed genes (DEGs) when testing for  
332 type, treatment, and interaction effects, respectively. The effects of type on gene expression can  
333 be visualized in a heatmap of expression for these DEGs (Figure 5), where heat tolerant colonies  
334 (red bars in figure 5) generally express these genes at higher levels than heat susceptible colonies  
335 (light blue bars in figure 5) regardless of treatment. A complete list of differentially expressed  
336 genes in each category is provided in Supplementary Table S3.

337 A substantial number of genes showed significant type by treatment effects, where the  
338 effects of treatment on expression differed between tolerant and susceptible corals. To  
339 characterize these interactions, we averaged expression for each gene in both susceptible and  
340 tolerant phenotypes for each treatment. To categorize gene expression patterns in these

341 interactions we conducted hierarchical clustering of expression patterns, subdividing the tree into  
342 clusters of correlated genes using the *cutree* function in R. Gene expression profiles could be  
343 categorized into two dominant patterns. In the first patterns, genes were expressed at overall  
344 higher levels in heat-tolerant corals and were downregulated during thermal stress, and expressed  
345 at lower levels overall in heat-susceptible corals but upregulated during thermal stress. We found  
346 159 genes in this category (Figure 6a). The second pattern was the opposite: genes that were  
347 expressed at higher levels overall and upregulated during thermal stress in heat-tolerant corals,  
348 and down-regulated in susceptible corals (Figure 6b). The remaining 33 genes formed a third  
349 cluster with similar patterns as 6b but with more variation across genes (not shown).

350

## 351 **Discussion**

352 Our study provides some of the first quantitative estimates for heritability of variation in  
353 adult corals' bleaching responses. This builds upon larval studies (Meyer *et al.*, 2009a, 2011;  
354 Dixon *et al.*, 2015) that have demonstrated substantial heritability in responses to elevated  
355 temperatures, but left uncertainty in whether these findings extended to adult corals with  
356 intracellular algal symbionts and the energetic demands of calcification. Our findings confirm  
357 that some coral populations harbor similar genetic variation in thermal tolerance traits of adult  
358 coral colonies. These parameters have been studied in Indo-Pacific Acroporids, but to our  
359 knowledge no quantitative estimates for heritability of thermal tolerance were previously  
360 available for corals in the Robust clade (Fukami *et al.*, 2008; Meyer *et al.*, 2009a, 2011; Kitahara  
361 *et al.*, 2010; Baums *et al.*, 2013; Dixon *et al.*, 2015) or any other Caribbean corals. This is an  
362 important consideration because heritability of a trait is specific to the population and  
363 environment under study, suggesting caution in generalizing results from Indo-Pacific larval  
364 studies of Acroporids to evaluate potential adaptive responses in the deeply diverged groups of  
365 corals that dominate Caribbean reefs (Meyer *et al.*, 2009a, 2011; Baums *et al.*, 2013; Dixon *et al.*,  
366 *et al.*, 2015; Kenkel *et al.*, 2015; Lohr & Patterson, 2017).

367 To investigate the functional basis for this variation in bleaching responses, we conducted  
368 genomic and transcriptomic studies comparing allele frequencies and transcriptional stress  
369 responses in these corals. We found genetic markers significantly associated with thermal  
370 tolerance, and used the integrated genomic resource developed from genetic linkage map and  
371 draft sequence assemblies to identify of some of the genes linked to these markers. We found

372 that transcriptional responses of heat-tolerant corals to thermal stress are markedly different from  
373 those of heat-susceptible colonies. We identified over 200 genes differentially expressed as a  
374 function of type  $\times$  treatment interactions, which were generally expressed at higher levels in  
375 tolerant corals and regulated in opposite directions by tolerant and susceptible corals in response  
376 to thermal stress.

377 This study builds on growing evidence that coral populations harbor genetic variation that  
378 may support adaptation to ocean warming. These questions are especially pressing for Caribbean  
379 corals, where reefs have declined severely over the last few decades. Since the genetic variation  
380 supporting heritable variation in traits under selection is species- and population-specific,  
381 measuring these parameters in Caribbean populations is vital for understanding the future of  
382 these ecosystems. Our study documents considerable genetic variation in thermal tolerance for a  
383 population of the mountainous star coral, *Orbicella faveolata*, an important reef-builder  
384 throughout the Caribbean.

385 This suggests the genetic potential for substantial adaptive responses to selection for  
386 thermal tolerance in this population. Responses to selection can be modeled with the univariate  
387 breeder's equation to estimate the expected rate of adaptation within a single generation  
388 (Falconer and Mackay, 1996). These predictions require empirical estimates for the narrow-sense  
389 heritability of the trait under selection, the proportion of phenotypic variation attributable to  
390 additive genetic variation (Falconer and Mackay, 1996). While it has been clear for some time  
391 that corals possess substantial variation in thermal tolerance, in part resulting from  
392 acclimatization or association with different algal symbionts (Fitt *et al.*, 2001; Howells *et al.*,  
393 2011; Oliver & Palumbi, 2011; Silverstein *et al.*, 2012), the variation attributable to genetic  
394 factors in the coral host has remained understudied. This genetic variation will determine the  
395 adaptive responses of corals in the immediate future, since rapid adaptation relies on standing  
396 genetic variation in natural populations (Barrett & Schluter, 2008). Our study contributes novel  
397 information on this potential for adaptation to ocean warming, confirming that heritability of  
398 bleaching responses in adult corals can be comparable to the high heritability of thermal  
399 tolerance observed in some previous larval studies (Dixon *et al.*, 2015).

400 Importantly, these estimates of  $h^2$  express genetic potential for adaptation, and other  
401 factors may constrain the adaptive responses that are actually realized in nature. The breeder's  
402 equation expresses the rate of adaptive change within a single generation, requiring that we

403 account for generation times to convert these estimates into units of adaptive change per decade  
404 or century. Massive corals like *Orbicella* are slow-growing and while direct estimates of  
405 generation time are unavailable for *O. faveolata* itself, comparisons with similar slow-growing  
406 massive corals suggests that these corals probably begin reproduction at ~ 5 years old and reach  
407 peak reproductive output around 10-15 years (Babcock, 1991). These life-history considerations  
408 impose inherent constraints on the rates of adaptation in this species, since even “rapid” adaptive  
409 changes occurring in a single generation would take 5-15 years to affect populations of adult  
410 corals. Additionally, correlations among traits can alter responses to selection relative to  
411 univariate predictions (Lande & Arnold, 1983; Houle, 1991; Falconer & Mackay, 1996; Lynch &  
412 Walsh, 1998). In these cases, selection for one trait affects the distribution of not only that trait,  
413 but also indirectly affects the distributions of correlated traits (Falconer & Mackay, 1996; Lynch  
414 & Walsh, 1998). Negative correlations among fitness related traits may constrain adaptive  
415 responses to selection (Etterson & Shaw, 2001), while positive correlations may facilitate  
416 adaptive responses (Agrawal & Stinchcombe, 2009). These correlations can change (even  
417 switching signs) in different environments (Messina & Fry, 2003; Sgrò & Hoffmann, 2004), so  
418 describing these effects is also required for understanding responses to selection. Future studies  
419 should investigate the possibility that trait correlations may constrain adaptive responses in  
420 corals, preventing these populations from achieving the rapid adaptive responses that  $h^2$   
421 estimates suggest are possible.

422         The development of sequencing-based approaches for multilocus SNP genotyping has  
423 made genome-wide association studies (GWAS) a widely used tool for identifying markers  
424 associated with traits of interest (Schlötterer *et al.*, 2015). These approaches map statistical  
425 associations between genetic markers and traits onto a genomic reference to identify regions of  
426 the genome underlying variation in the trait. Such an analysis obviously requires a genomic  
427 resource for mapping, and this requirement has limited the application of these approaches in  
428 many non-model systems. Despite limitations in the genomic resources available for *O.*  
429 *faveolata*, we used an integrated resource our group has recently established (Snelling *et al.*,  
430 2017) to map statistical associations with bleaching responses onto the *O. faveolata* genome. It’s  
431 important to acknowledge that our study was underpowered with only 43 genotypes (logistical  
432 constraints prevented us from further sampling, in this case). Despite the low power of our



433 sampling design, we succeeded in identifying genetic markers associated with variation in  
434 bleaching responses.

435         These significant markers are linked to biologically interesting genes that could  
436 contribute to host thermal tolerance. For example, we found genes functions involved in  
437 oxidative stress, neural responses, and cytoskeletal organization. Poly (ADP-ribose) polymerase  
438 has been previously described in the sea anemone *Nematostella vectensis* as a mechanism for  
439 activating TRP channels involved in producing a cellular response to oxidative stress (Kühn *et*  
440 *al.*, 2016). Linkage with this gene could indicate a role for this gene in cellular responses to  
441 thermal stress. Voltage-gated proteins have also been characterized in *Nematostella vectensis* and  
442 have shown the importance of these proteins for maintaining cellular homeostasis, regulation of  
443 movement, and feeding. Cnidarians have an extensive set of potassium voltage-gated channels  
444 and the functional diversity is profound, but their true cellular role is still unknown (Jegla *et al.*,  
445 2012). Perhaps the most interesting is the universal stress protein found in close proximity with  
446 our SNP on linkage group 5. This intriguing protein, originally discovered in prokaryotes and  
447 subsequently documented through metazoans (Jong *et al.*, 2011) has been previously reported in  
448 studies of thermal stress responses in Cnidarians (Bellantuono *et al.*, 2012b). The close proximity  
449 to our SNPs suggests a possible role for this gene in determining variation in thermal tolerance  
450 among colonies of *O. faveolata*.

451         High-throughput sequencing has also enabled widespread application of RNA-Seq  
452 approaches to profile gene expression (Wang *et al.*, 2009). These methods have been widely  
453 adopted to study transcriptional responses to thermal stress in corals (DeSalvo *et al.*, 2008;  
454 Woolstra *et al.*, 2009; Leggat *et al.*, 2011; Meyer *et al.*, 2011; Oliver & Palumbi, 2011;  
455 Bellantuono *et al.*, 2012a, 2012b; Barshis *et al.*, 2013; Kenkel *et al.*, 2013; Palumbi *et al.*, 2014).  
456 One finding that has emerged consistently from these studies is the observation that corals vary  
457 widely in their transcriptional and phenotypic responses to thermal stress (Hunter, 1993; Ayre *et*  
458 *al.*, 1997; Marshall & Baird, 2000; Baums *et al.*, 2013). Many studies have demonstrated  
459 variation in gene expression among coral phenotypes, both in natural populations and in  
460 controlled studies (López-Maury *et al.*, 2008; DeSalvo *et al.*, 2010; Meyer *et al.*, 2011;  
461 Granados-Cifuentes *et al.*, 2013).

462         Here, we built upon these studies by quantifying variation in transcriptional responses to  
463 thermal stress in the context of known genetic relationships and thermal tolerance phenotypes.

464 We found that heat-tolerant and -susceptible corals differed substantially in their responses to  
465 thermal stress. Focusing on the genes differentially expressed as a function of the type ×  
466 treatment interaction, we identified a cluster of genes that were constitutively expressed at higher  
467 levels in heat-tolerant corals than their susceptible counterparts, and were down-regulated during  
468 thermal stress whereas susceptible corals up-regulated the same genes (Fig 6a). These included  
469 genes associated with protein metabolism (eight ribosomal protein genes, E3 ubiquitin protein  
470 ligase, and ubiquitin-conjugating enzyme E2), regulation of apoptosis (cathepsin-L and AP-1),  
471 and genes associated with calcium-binding (calcium-binding protein CML19, calretinin,  
472 neurocalcin, and a voltage-dependent L-type calcium channel). Inferring functional  
473 consequences from gene expression profiles is always uncertain, but these patterns suggest that  
474 thermal tolerance phenotypes in corals may be achieved in part by down-regulating energetically  
475 expensive processes such as protein synthesis, and in part by altering expression of the  
476 regulatory machinery controlling apoptosis. We also identified a cluster of genes showing the  
477 opposite pattern (up-regulated by heat-tolerant corals during thermal stress), which included a  
478 fluorescent protein. These proteins are commonly reported in studies of Cnidarian stress  
479 responses (Smith-Keune & Dove, 2008; Rodriguez-Lanetty *et al.*, 2009; Roth & Deheyn, 2013),  
480 and our findings suggest that differential regulation of these genes may play a role in variation  
481 among corals' thermal tolerances.

482 Overall, our study provides a novel perspective on the potential for corals' adaptation to  
483 ocean warming by estimating heritability of variation in thermal tolerance for a Caribbean reef-  
484 builder. We found that corals sampled from a natural population in Panama varied widely in their  
485 bleaching responses during an experimental thermal stress treatment. We used multilocus SNP  
486 genotyping to infer genetic relatedness among corals and estimate narrow-sense heritability ( $h^2$ )  
487 for variation in bleaching responses, revealing that variation in this trait is primarily attributable  
488 to additive genetic variation. This suggests substantial genetic potential for adaptation to ocean  
489 warming in this population, although the complexities of multivariate selection suggest caution  
490 in predicting responses to selection from a single trait. We used the same SNP genotypes to test  
491 for associations between bleaching responses and genotypes at each marker, identifying genetic  
492 markers for bleaching responses that can be directly applied in restoration and conservation  
493 efforts to identify heat-tolerant corals after further study to evaluate the generalizability of these  
494 associations. We used expression profiling to demonstrate that heat-tolerant corals respond to

495 thermal stress differently than susceptible corals, and functional analysis of the differentially  
496 expressed genes suggests differential regulation of protein metabolism and apoptosis in heat-  
497 tolerant corals. Our findings provide crucial data for models aiming to predict corals' adaptation  
498 to ocean warming, and identify genetic markers for thermal tolerance that may be useful for  
499 restoration efforts as conservation biologists work to reverse the global degradation of coral  
500 populations resulting from changing ocean conditions.

501

## 502 **Acknowledgements**

503 The authors are grateful to the Smithsonian Tropical Research Institute and the Institute  
504 for Tropical Ecology and Conservation for use of their facilities and for assistance with sample  
505 collection and fieldwork logistics. We thank Rachel Vasta and Chelsea Eckhart for assistance  
506 with sample processing. We thank Oregon State University's College of Science for travel  
507 assistance through a travel grant to KD.

508

## 509 **Authors' Contributions**

510 KD and EM conceived the study and conducted analyses. KD collected samples,  
511 conducted thermal stress experiments, prepared sequencing libraries, and wrote the manuscript.  
512 HD contributed to sample collection and fieldwork assistance. All authors have read and  
513 approved the manuscript.

514

515

516 **Figures and Tables**

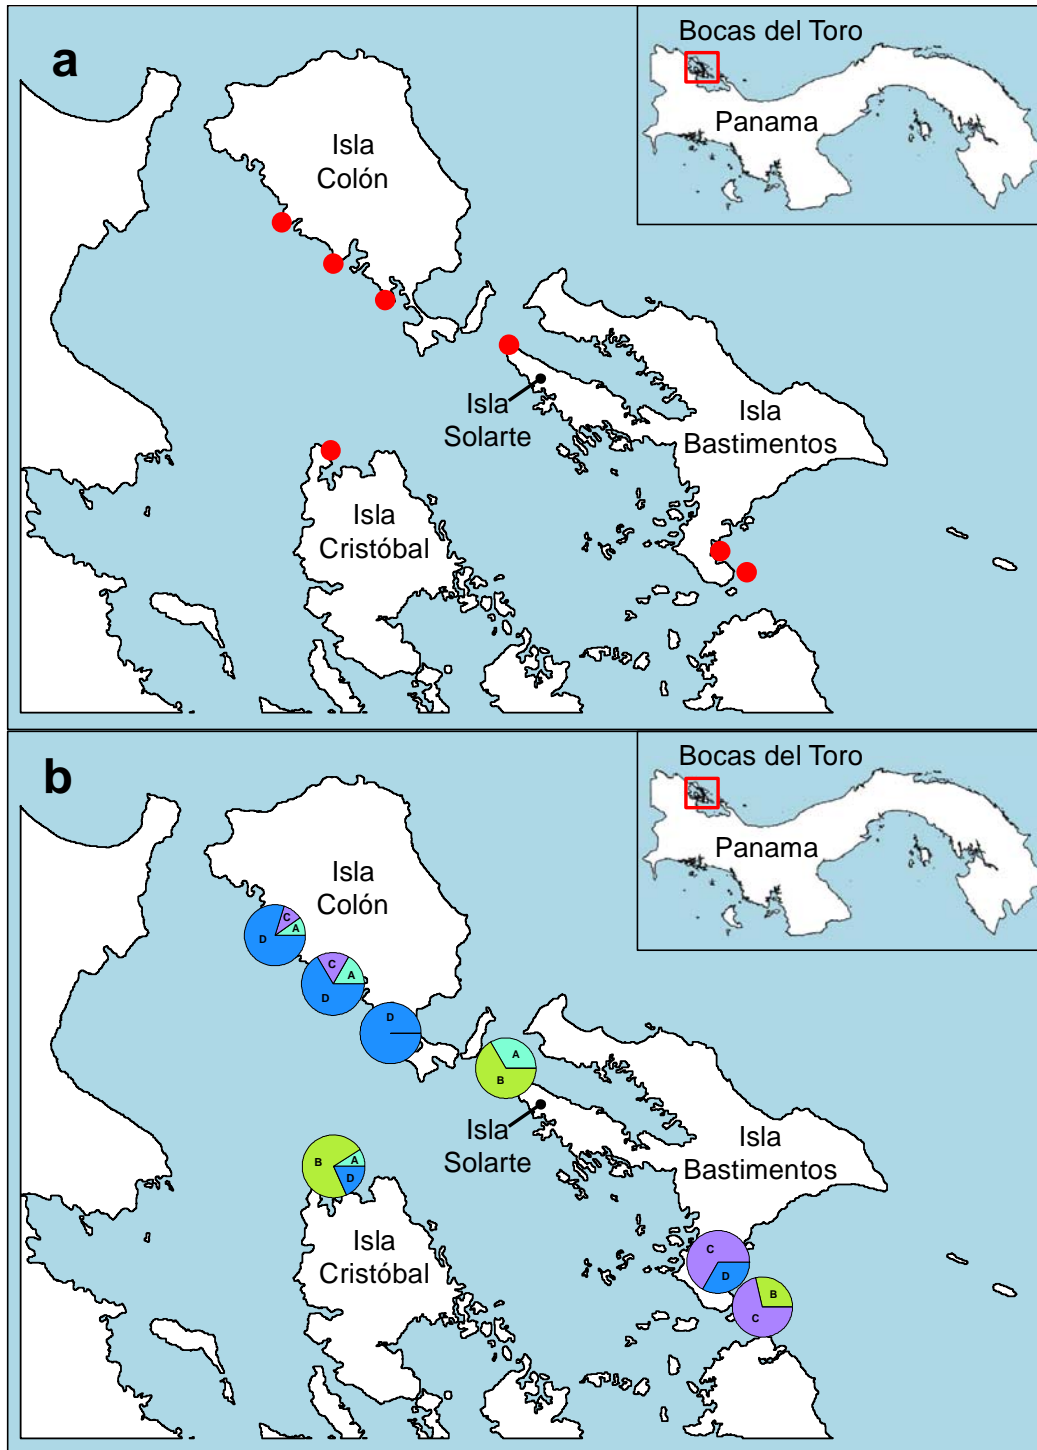

517  
518 **Figure 1.** Map of collection sites around Bocas del Toro Archipelago, Panama. (a) Map of the  
519 seven locations where coral genotypes were collected around the archipelago. (b) Proportion of  
520 dominant symbiont types found at each site across colonies collected.

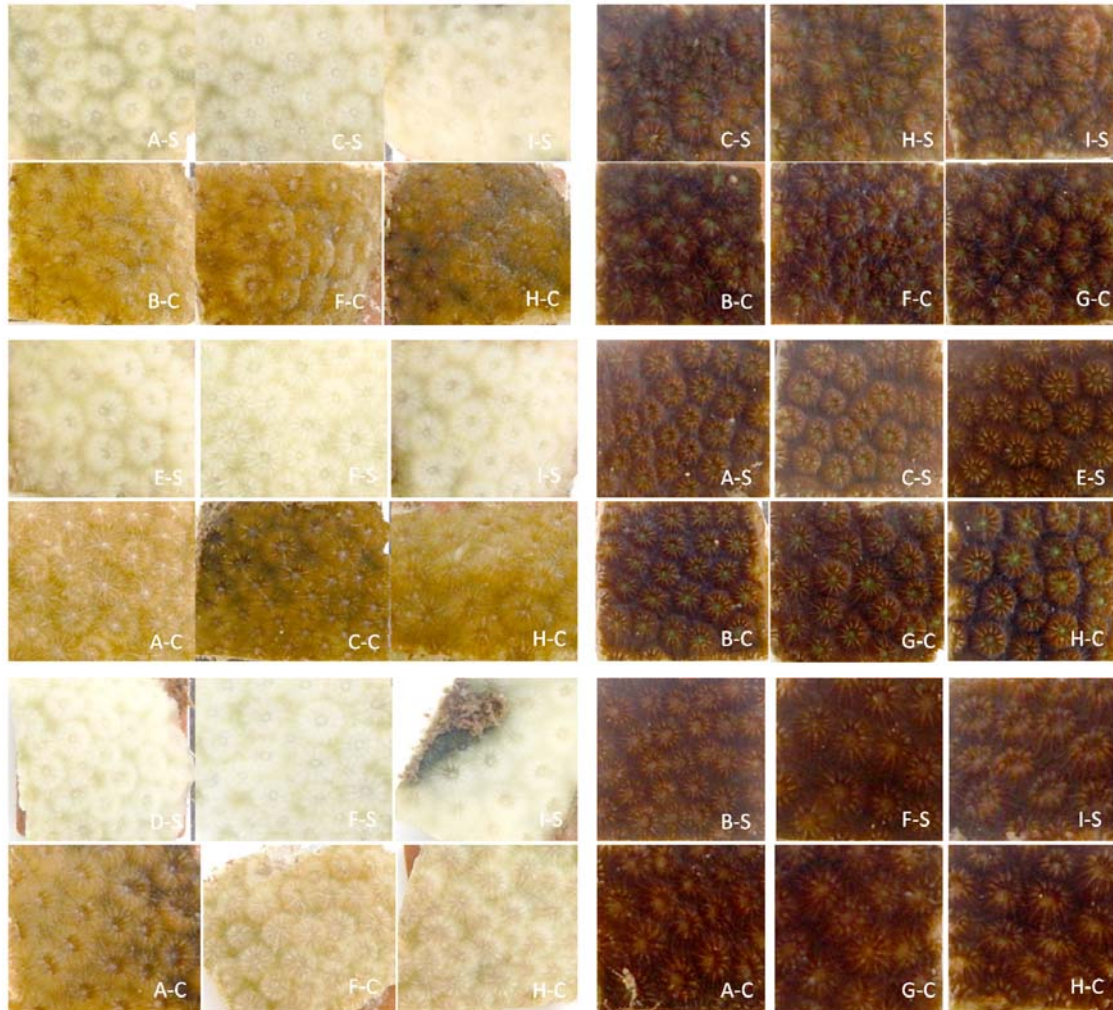

521

522 **Figure 2.** An example of the striking contrast between bleaching phenotypes of heat-susceptible  
523 and -tolerant corals sampled for this study. Each panel of six images represents fragments from a  
524 single colony, with control fragments indicated with “-C” (bottom of each panel) and heat-  
525 stressed fragments indicated with “-S” (top of each panel). Bleaching responses varied widely  
526 among colonies, but very little among fragments prepared from each colony.

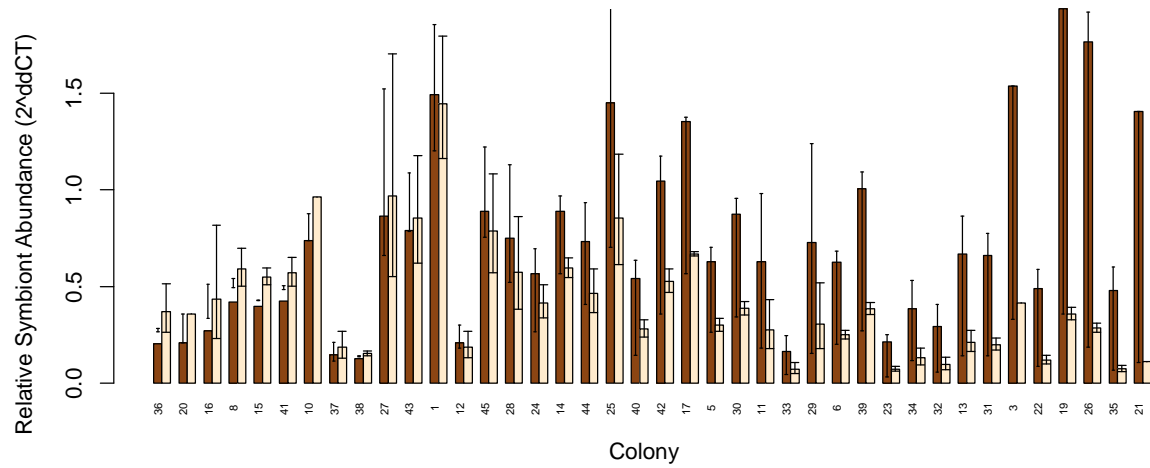

527  
528 **Figure 3.** Quantification of algal symbiont densities using qPCR reveals variation in bleaching  
529 phenotypes. Control (brown) and stress (white) bars represent relative symbiont abundance after  
530 four weeks in experimental conditions. Bars are paired for each colony and colonies are ordered  
531 by their relative change in symbiont abundance (bleaching response) between control and stress  
532 treatments.

533  
534  
535  
536  
537  
538  
539  
540



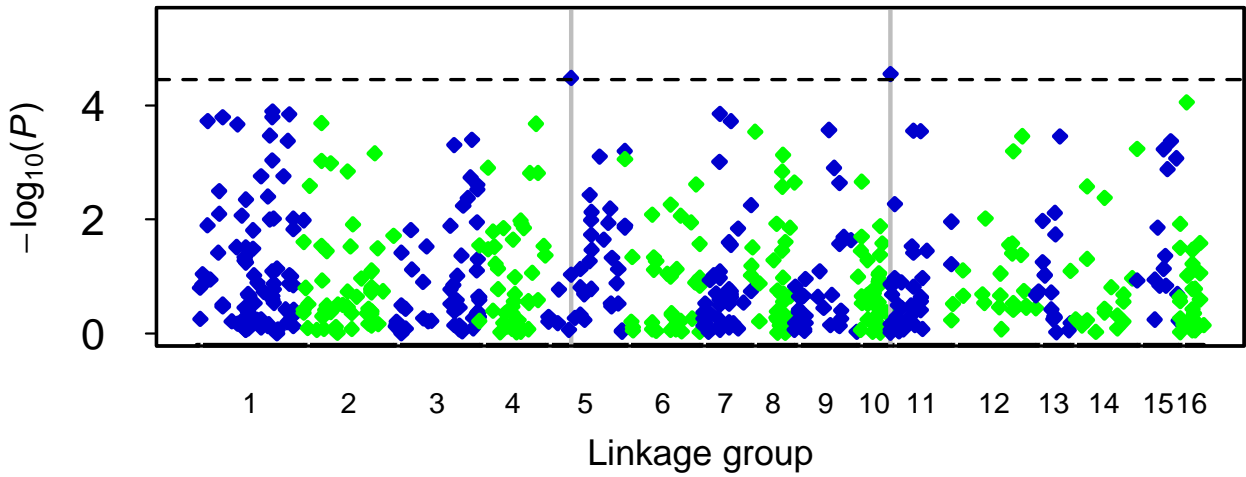

541  
542 **Figure 4.** Mapping statistical associations between SNP genotypes and bleaching responses onto  
543 the linkage map identifies genomic regions associated with thermal tolerance in *O. faveolata*.  
544 Genetic markers are mapped against the linkage groups, indicated by alternating colors. Two  
545 markers, on linkage group 5 and 6, were significantly associated (gray lines) with variation in  
546 bleaching responses during thermal stress (FDR<0.05).  
547

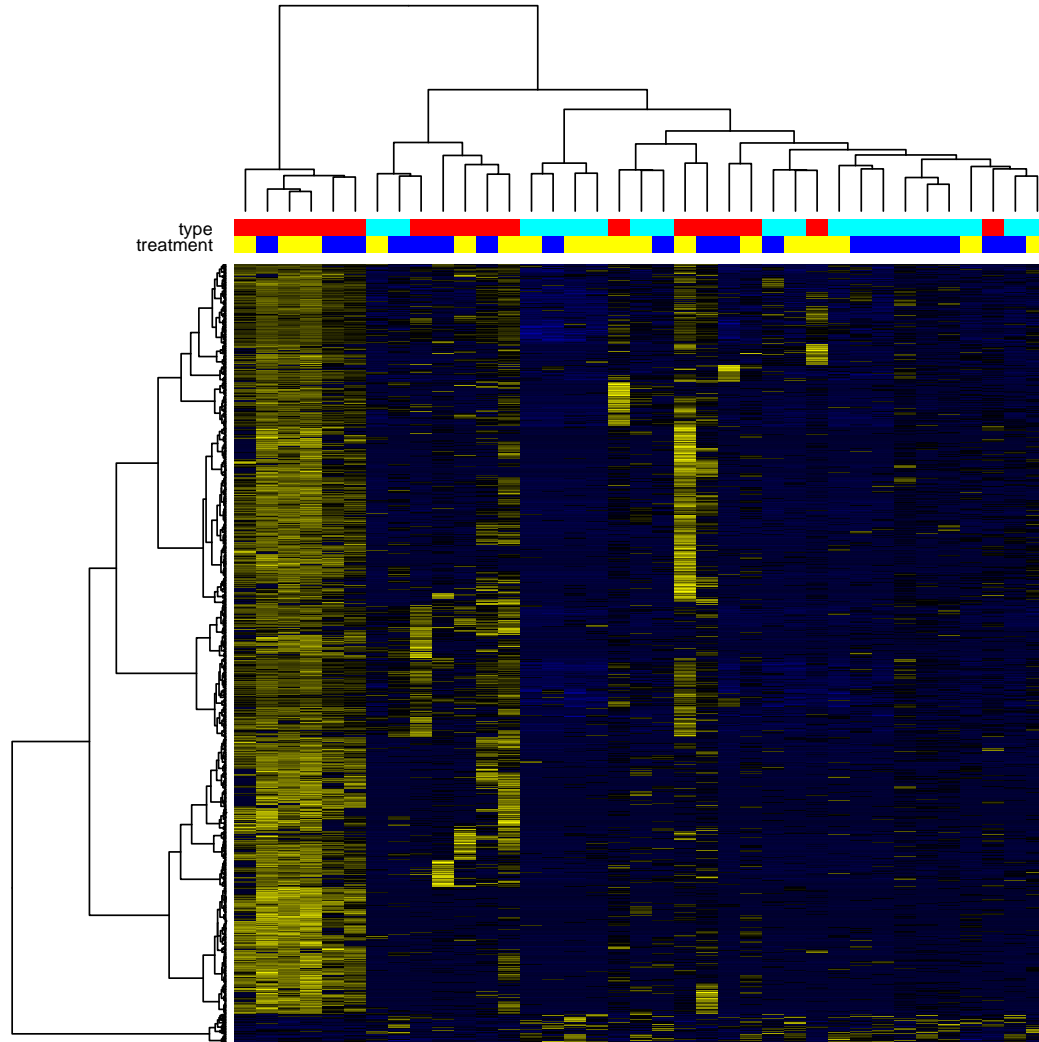

548

549 **Figure 5.** Heatmap showing relative expression of genes that were differentially expressed  
550 between heat-tolerant and heat-susceptible corals. The 1,097 DEG in this category are shown  
551 here, with samples and genes grouped with hierarchical clustering based on similarity in gene  
552 expression patterns. In the heatmap, blue indicates low expression, black moderate expression,  
553 and yellow indicates high expression. Colored bars indicate the type and treatment of each  
554 sample included in this analysis; red type refers to tolerant phenotypes, light blue refers to  
555 susceptible phenotypes, yellow bars are control samples, and dark blue bars are samples in heat  
556 stress treatment.

557

558

559

560

561  
562  
563  
564  
565  
566  
567  
568  
569  
570  
571  
572  
573  
574  
575  
576  
577  
578  
579  
580  
581  
582  
583

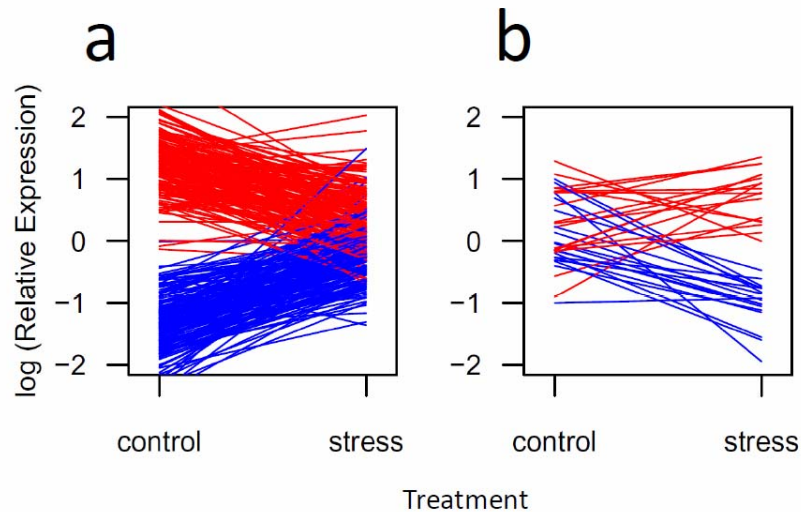

**Figure 6.** Type  $\times$  treatment effects on gene expression fall into two general categories. a) 159 genes were downregulated in heat-tolerant corals (red) and upregulated in heat-susceptible corals (blue). b) 18 genes showed contrasting expression changes, but in the opposite directions: up-regulated in heat-tolerant corals and down-regulated in heat-susceptible corals. The remaining 33 genes showed similar patterns to (b) but were less consistent across genes, forming a third cluster (not shown).

584 **Supplementary Information**

585

586 Supplementary Table S1. Excel spreadsheet. Summary of sequencing yields, processing, and  
587 mapping efficiencies for RNASeq and 2bRAD sequencing libraries.

588

589 Supplementary Table S2. Excel spreadsheet. Complete list of genes linked to SNP markers  
590 significantly associated with variation in bleaching responses (within 10 cM of the markers).

591

592 Supplementary Table S3. Excel spreadsheet. Complete list of genes differentially expressed as a  
593 function of temperature, thermal tolerance type, or their interactions.

594

595

596 **References**

- 597 Abrego D, Ulstrup KE, Willis BL, van Oppen MJH (2008) Species-specific interactions between  
598 algal endosymbionts and coral hosts define their bleaching response to heat and light stress.  
599 *Proceedings of the Royal Society B: Biological Sciences*, **275**, 2273–2282.
- 600 Agrawal AF, Stinchcombe JR (2009) How much do genetic covariances alter the rate of  
601 adaptation? *Proceedings of the Royal Society B: Biological Sciences*, **276**, 1183–1191.
- 602 Anderson DA, Walz ME, Weil E, Smith MC (2016) RNA-Seq of the Caribbean reef-building  
603 coral *Orbicella faveolata* ( Scleractinia- Merulinidae ) under bleaching and disease stress  
604 expands models of coral innate immunity. *PeerJ*, **4:e1616**, DOI 10.7717/peerj.1616.
- 605 Ayre DJ, Hughes TP, Standish RJ (1997) Genetic differentiation, reproductive mode, and gene  
606 flow in the brooding coral *Pocillopora damicornis* along the Great Barrier Reef, Australia.  
607 *Mar Ecol Prog Ser*, **159**, 175–187.
- 608 Babcock RC (1991) Comparative demography of three species of scleractinian corals using age-  
609 and size-dependant classifications. *Ecological Monographs*, **61**, 225–244.
- 610 Baker AC, Starger CJ, McClanahan TR, Glynn PW (2004) Coral reefs: Corals' adaptive  
611 response to climate change. *Nature*, **430**, 741–741.
- 612 Barrett RDH, Schluter D (2008) Adaptation from standing genetic variation. *Trends in Ecology  
613 and Evolution*, **23**, 38–44.
- 614 Barshis DJ, Ladner JT, Oliver TA, Seneca FO, Traylor-Knowles N, Palumbi SR (2013) Genomic  
615 basis for coral resilience to climate change. *PNAS*, **110**, 1387–1392.
- 616 Baums IB, Polato NR, Xu D et al. (2013) Genotypic variation influences reproductive success  
617 and thermal stress tolerance in the reef building coral , *Acropora palmata*. *Coral Reefs*, **32**,  
618 703–717.
- 619 Bellantuono AJ, Hoegh-Guldberg O, Rodriguez-Lanetty M (2012a) Resistance to thermal stress  
620 in corals without changes in symbiont composition. *Proceedings of the Royal Society B:  
621 Biological Sciences*, **279**, 1100–1107.
- 622 Bellantuono AJAJ, Granados-Cifuentes CC, Miller DJDJ, Hoegh-Guldberg OO, Rodriguez-  
623 Lanetty MM (2012b) Coral thermal tolerance: tuning gene expression to resist thermal  
624 stress. **7**, e50685.
- 625 Brown BE (1997) Coral bleaching: causes and consequences. *Coral Reefs*, **16**, S129–S138.
- 626 Coles SL, Riegl BM (2013) Thermal tolerances of reef corals in the Gulf: A review of the

- 627 potential for increasing coral survival and adaptation to climate change through assisted  
628 translocation. *Marine pollution bulletin*, **72**, 323–332.
- 629 Császár NBM, Ralph PJ, Frankham R, Berkelmans R, van Oppen MJH (2010) Estimating the  
630 potential for adaptation of corals to climate warming. *PLoS ONE*, **5**, e9751–e9751.
- 631 Cunning R, Silverstein RN, Baker AC (2015) Investigating the causes and consequences of  
632 symbiont shuffling in a multi-partner reef coral symbiosis under environmental change.  
633 *Proceedings of the Royal Society of London B: Biological Sciences*, **282**, 20141725.
- 634 D'Angelo C, Hume BCC, Burt J, Smith EG, Achterberg EP, Wiedenmann J (2015) Local  
635 adaptation constrains the distribution potential of heat-tolerant *Symbiodinium* from the  
636 Persian/Arabian Gulf. *The ISME Journal*, **9**, 2551–2560.
- 637 DeSalvo MK, Voolstra CR, Sunagawa S et al. (2008) Differential gene expression during  
638 thermal stress and bleaching in the Caribbean coral *Montastraea faveolata*. *Molecular*  
639 *Ecology*, **17**, 3952–3971.
- 640 DeSalvo MK, Sunagawa S, Voolstra CR (2010) Transcriptomic responses to heat stress and  
641 bleaching in the elkhorn coral *Acropora palmata*. *Marine Ecology Progress Series*, **402**, 97–  
642 113.
- 643 Dixon GB, Davies SW, Aglyamova GV, Meyer E, Bay LK, Matz MV (2015) Genomic  
644 determinants of coral heat tolerance across latitudes. **348**, 2014–2016.
- 645 Donner SD, Skirving WJ, Little CM, Oppenheimer M, Hoegh-Gulberg O (2005) Global  
646 assessment of coral bleaching and required rates of adaptation under climate change. *Global*  
647 *Change Biology*, **11**, 2251–2265.
- 648 Eakin CM, Lough JM, Heron SF, Stednick JD (2009) Climate variability and change:  
649 Monitoring data and evidence for increased coral bleaching stress. *Coral Bleaching*, **205**,  
650 41–67.
- 651 Etterson JR, Shaw RG (2001) Constraint to Adaptive Evolution in Response to Global Warming.  
652 *Science*, **151**, 151–154.
- 653 Falconer DS, Mackay TFC (1996) *Introduction to Quantitative Genetics*, 4th edn. Pearson  
654 Education.
- 655 Fitt W, Brown B, Warner M, Dunne R (2001) Coral bleaching: interpretation of thermal  
656 tolerance limits and thermal thresholds in tropical corals. *Coral reefs*, **20**, 51–65.
- 657 Fukami H, Chen CA, Budd AF et al. (2008) Mitochondrial and nuclear genes suggest that stony



- 658 corals are monophyletic but most families of stony corals are not (Order Scleractinia, Class  
659 anthozoa, phylum cnidaria). *PLoS ONE*, **3**, e3222.
- 660 Gardner TA (2003) Long-Term Region-Wide Declines in Caribbean Corals. *Science*, **301**, 958–  
661 960.
- 662 Granados-Cifuentes C, Bellantuono AJ, Ridgway T, Hoegh-Guldberg O, Rodriguez-Lanetty M  
663 (2013) High natural gene expression variation in the reef-building coral *Acropora*  
664 *millepora*: potential for acclimative and adaptive plasticity. *BMC Genomics*, **14**, 228.
- 665 Grottoli AG, Warner ME, Levas SJ et al. (2014) The cumulative impact of annual coral  
666 bleaching can turn some coral species winners into losers. *Global Change Biology*, **20**,  
667 3823–3833.
- 668 Hoegh-Guldberg O, Jones RJ (1999) Photoinhibition and photoprotection in symbiotic  
669 dinoflagellates from reef-building corals. *Mar Ecol Prog Ser*, **183**, 73–86.
- 670 Hoegh-Guldberg O, Mumby PJ, Hooten AJ et al. (2007) Coral Reefs Under Rapid Climate  
671 Change and Ocean Acidification. *Science*, **318**, 1737–1742.
- 672 Houle D (1991) Genetic Covariance of Fitness Correlates: What Genetic Correlations are  
673 Made of and Why it Matters. *Evolution*, **45**, 630–648.
- 674 Howells EJ, Beltran VH, Larsen NW, Bay LK, Willis BL, van Oppen MJH (2011) Coral thermal  
675 tolerance shaped by local adaptation of photosymbionts. *Nature Climate Change*, **2**, 116–  
676 120.
- 677 Howells EJ, Abrego D, Meyer E, Kirk NL, Burt JA (2016) Host adaptation and unexpected  
678 symbiont partners enable reef-building corals to tolerate extreme temperatures. *Global*  
679 *Change Biology*, **22**, 2702–2714.
- 680 Hughes TP (2003) Climate Change, Human Impacts, and the Resilience of Coral Reefs. *Science*,  
681 **301**, 929–933.
- 682 Hughes TP, Tanner JE (2000) Recruitment Failure, Life Histories, and Long-Term Decline of  
683 Caribbean Corals. *Ecology*, **81**, 2250–2263.
- 684 Hughes TP, Kerry JT, Álvarez-Noriega M et al. (2017) Global warming and recurrent mass  
685 bleaching of corals. *Nature*, **543**, 373–377.
- 686 Hunter CL (1993) Genotypic Variation and Clonal Structure in Coral Populations with Different  
687 Disturbance Histories. *Evolution*, **47**, 1213–1228.
- 688 Hunter RL, LaJeunesse TC, Santos SR (2007) Structure and evolution of the rDNA internal

- 689 transcribed spacer (ITS) region 2 in the symbiotic dinoflagellates (Symbiodinium,  
690 Dinophyta). *Journal of Phycology*, **43**, 120–128.
- 691 Jegla T, Marlow HQ, Chen B, Simmons DK, Jacobo SM, Martindale MQ (2012) Expanded  
692 Functional Diversity of Shaker K + Channels in Cnidarians Is Driven by Gene Expansion.  
693 *PLoS ONE*, **7**, e51366.
- 694 Jones A, Berkelmans R (2010) Potential costs of acclimatization to a warmer climate: growth of  
695 a reef coral with heat tolerant vs. sensitive symbiont types. *PLoS ONE*, **5**, e10437.
- 696 Jones AM, Berkelmans R, van OPPEN MJH, Mieog JC, Sinclair W (2008) A community change  
697 in the algal endosymbionts of a scleractinian coral following a natural bleaching event: field  
698 evidence of acclimatization. *Proceedings. Biological sciences / The Royal Society*, **275**,  
699 1359–1365.
- 700 Jong D De, Bieller A, Hemmrich G et al. (2011) Phylogenomics Reveals an Anomalous  
701 Distribution of USP Genes in Metazoans. *Molecular Biology and Evolution*, **28**, 153–161.
- 702 Kenkel CD, Meyer E, Matz M V. (2013) Gene expression under chronic heat stress in  
703 populations of the mustard hill coral (*Porites astreoides*) from different thermal  
704 environments. *Molecular Ecology*, **22**, 4322–4334.
- 705 Kenkel CD, Setta SP, MATZ M V (2015) Heritable differences in fitness-related traits among  
706 populations of the mustard hill coral, *Porites astreoides*. *Heredity*, **115**, 509–516.
- 707 Kitahara M V, Cairns SD, Stolarski J, Blair D, Miller DJ (2010) A Comprehensive Phylogenetic  
708 Analysis of the Scleractinia (Cnidaria, Anthozoa) Based on Mitochondrial CO1 Sequence  
709 Data (ed DeSalle R). *PLoS ONE*, **5**, e11490.
- 710 Kühn FJP, Kühn C, Winking M, Hoffmann DC, Lückhoff A (2016) ADP-Ribose Activates the  
711 TRPM2 Channel from the Sea Anemone *Nematostella vectensis* Independently of the  
712 NUDT9H Domain. *PLoS ONE*, **11**, e0158060.
- 713 Kumar S, Stecher G, Tamura K (2017) MEGA7: Molecular Evolutionary Genetics Analysis  
714 Version 7.0 for Bigger Datasets. **33**, 1870–1874.
- 715 Lande R, Arnold SJ (1983) The Measurement of Selection on Correlated Characters. *Evolution*,  
716 **37**, 1210–1226.
- 717 Leggat WW, Seneca FF, Wasmund KK, Ukani LL, Yellowlees DD, Ainsworth TDTD (2011)  
718 Differential responses of the coral host and their algal symbiont to thermal stress. *PLoS*  
719 *ONE*, **6**, e26687.

- 720 Lohr KE, Patterson JT (2017) Intraspecific variation in phenotype among nursery-reared  
721 staghorn coral *Acropora cervicornis* (Lamarck, 1816). *Journal of Experimental Marine*  
722 *Biology and Ecology*, **486**, 87–92.
- 723 López-Maury L, Marguerat S, Bähler J (2008) Tuning gene expression to changing  
724 environments: from rapid responses to evolutionary adaptation. *Nature Reviews: Genetics*,  
725 **9**, 583–593.
- 726 Love MI, Huber W, Anders S (2014) Moderated estimation of fold change and dispersion for  
727 RNA-seq data with DESeq2. *Genome biology*, **15**, 1–21.
- 728 Lynch M, Walsh B (1998) *Genetics and Analysis of Quantitative Traits*. Sinauer Sunderland,  
729 MA, 980 pp.
- 730 Marshall PA, Baird AH (2000) Bleaching of corals on the Great Barrier Reef: differential  
731 susceptibilities among taxa. *Coral reefs*, **19**, 155–163.
- 732 Messina FJ, Fry JD (2003) Environment-dependent reversal of a life history trade-off in the seed  
733 beetle *Callosobruchus maculatus*. *Journal of Evolutionary Biology*, **16**, 501–509.
- 734 Meyer E, Davies S, Wang S, Willis BL, Abrego D (2009a) Genetic variation in responses to a  
735 settlement cue and elevated temperature in the reef-building coral *Acropora millepora*. *Mar*  
736 *Ecol Prog Ser*, **392**, 81–92.
- 737 Meyer E, Aglyamova G V, Wang S et al. (2009b) Sequencing and de novo analysis of a coral  
738 larval transcriptome using 454 GSFlx. *BMC genomics*, **10**, 219.
- 739 Meyer E, Aglyamova G V, Matz M V (2011) Profiling gene expression responses of coral larvae  
740 (*Acropora millepora*) to elevated temperature and settlement inducers using a novel  
741 RNA-Seq procedure. *Molecular Ecology*, **20**, 3599–3616.
- 742 Morrissey MB, Parker DJ, Korsten P, Pemberton JM, Kruuk LEB, Wilson AJ (2012) The  
743 prediction of adaptive evolution: Empirical application of the secondary theorem of  
744 selection and comparison to the breeder's equation. *Evolution*, **66**, 2399–2410.
- 745 Muir P, Frasier T (2015) Related $\square$ : an R package for analysing pairwise relatedness from  
746 codominant molecular markers related $\square$ : an R package for analysing pairwise relatedness  
747 from codominant molecular markers. *Molecular Ecology Resources*, **15**, 557–561.
- 748 Oliver TA, Palumbi SR (2011) Do fluctuating temperature environments elevate coral thermal  
749 tolerance? *Coral reefs*, **30**, 429–440.
- 750 Van Oppen MJH, Mahiny AJ, Done TJ (2005) Geographic distribution of zooxanthella types in

- 751 three coral species on the Great Barrier Reef sampled after the 2002 bleaching event. *Coral*  
752 *Reefs*, **24**, 482–487.
- 753 Palumbi SR, Barshis DJ, Traylor-Knowles N, Bay RA (2014) Mechanisms of reef coral  
754 resistance to future climate change. *Science*, **344**, 895–898.
- 755 Queller DC, Goodnight KF (1989) Estimating Relatedness Using Genetic Markers. *Evolution*,  
756 **43**, 258–275.
- 757 Rodriguez-Lanetty M, Harii S, Hoegh-Guldberg O (2009) Early molecular responses of coral  
758 larvae to hyperthermal stress. *Molecular Ecology*, **18**, 5101–5114.
- 759 Roth MS, Deheyn DD (2013) Effects of cold stress and heat stress on coral fluorescence in reef-  
760 building corals. *Scientific reports*, **3**, 1421.
- 761 Rumble SM, Lacroute P, Dalca A V., Fiume M, Sidow A, Brudno M (2009) SHRiMP: Accurate  
762 mapping of short color-space reads. *PLoS Computational Biology*, **5**, 1–11.
- 763 Schlotterer C, Kofler R, Versace E, Tobler R, Franssen SU (2015) Combining experimental  
764 evolution with next-generation sequencing: a powerful tool to study adaptation from  
765 standing genetic variation. *Heredity*, **114**, 431–440.
- 766 Sgrò CM, Hoffmann AA (2004) Genetic correlations, tradeoffs and environmental variation.  
767 *Heredity*, **93**, 241–248.
- 768 Silverstein RN, Correa AMS, Baker AC (2012) Specificity is rarely absolute in coral-algal  
769 symbiosis: implications for coral response to climate change. *Proceedings of the Royal*  
770 *Society B: Biological Sciences*, **279**, 2609–2618.
- 771 Smith-Keune CC, Dove SS (2008) Gene expression of a green fluorescent protein homolog as a  
772 host-specific biomarker of heat stress within a reef-building coral. *Marine Biotechnology*,  
773 **10**, 166–180.
- 774 Snelling J, Dziedzic K, Guermond S, Meyer E (2017) Integrating genomic resources for a  
775 threatened Caribbean coral (*Orbicella faveolata*) using a genetic linkage map developed  
776 from individual larval genotypes. *bioRxiv*, **2925759**, 1–40.
- 777 Storey JD (2003) The positive false discovery rate: A Bayesian interpretation and the q-value.  
778 *Annals of Statistics*, **31**, 2013–2035.
- 779 T L (2002) Diversity and community structure of symbiotic dinoflagellates from Caribbean coral  
780 reefs. *Marine biology*, **141**, 387–400.
- 781 Visscher PM, Hill WG, Wray NR (2008) Heritability in the genomics era — concepts and

- 782           misconceptions. *Nature Reviews Genetics*, **9**, 255–266.
- 783   Voolstra CR, Schnetzer J, Peshkin L, Randall CJ, Szmant AM, Medina M (2009) Effects of  
784           temperature on gene expression in embryos of the coral *Montastraea faveolata*. *BMC*  
785           *Genomics*, **10**, 627.
- 786   Wang Z, Gerstein M, Snyder M (2009) RNA-Seq: a revolutionary tool for transcriptomics.  
787           *Nature Reviews: Genetics*, **10**, 57–63.
- 788   Wang S, Meyer E, McKay JK, Matz M V (2012) 2b-RAD: a simple and flexible method for  
789           genome-wide genotyping. *Nature Methods*, **9**, 808–810.
- 790
